# Supplementary material for: Effect of Light Availability on the Interaction between Maritime Pine and the Pine Weevil: Light Drives Insect Feeding Behavior But Also the Defensive Capabilities of the Host
Source: PubMed Central journal article supplement (PMC5583597; doi:10.3389/fpls.2017.01452), 2017-08-29
Supplement: Image_2.pdf [file Image_2.pdf]

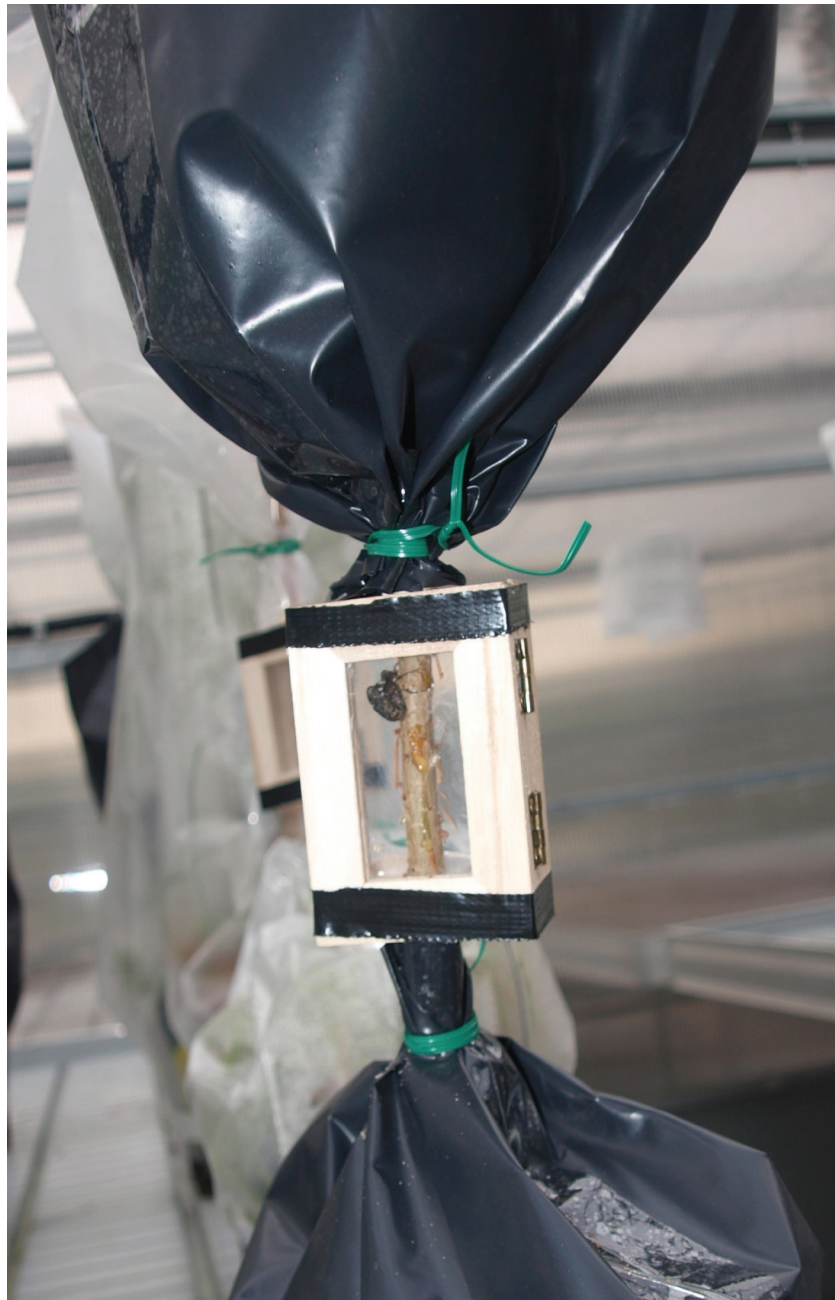

Figure S2. View of a wood cage fitted around the experimental part of the stem with a male and a female pine weevils (*Hylobius abietis*) confined inside the cage. This example corresponds to the combination of natural sunlight treatment on insect (cage with transparent lateral acrylic sheets) and darkness on the plant (black polyethylene bag covering the plant above and below the experimental part of the stem).
