# Supplementary material for: Effect of Light Availability on the Interaction between Maritime Pine and the Pine Weevil: Light Drives Insect Feeding Behavior But Also the Defensive Capabilities of the Host
Source: PubMed Central journal article supplement (PMC5583597; doi:10.3389/fpls.2017.01452), 2017-08-29
Supplement: Image_4.pdf [file Image_4.pdf]

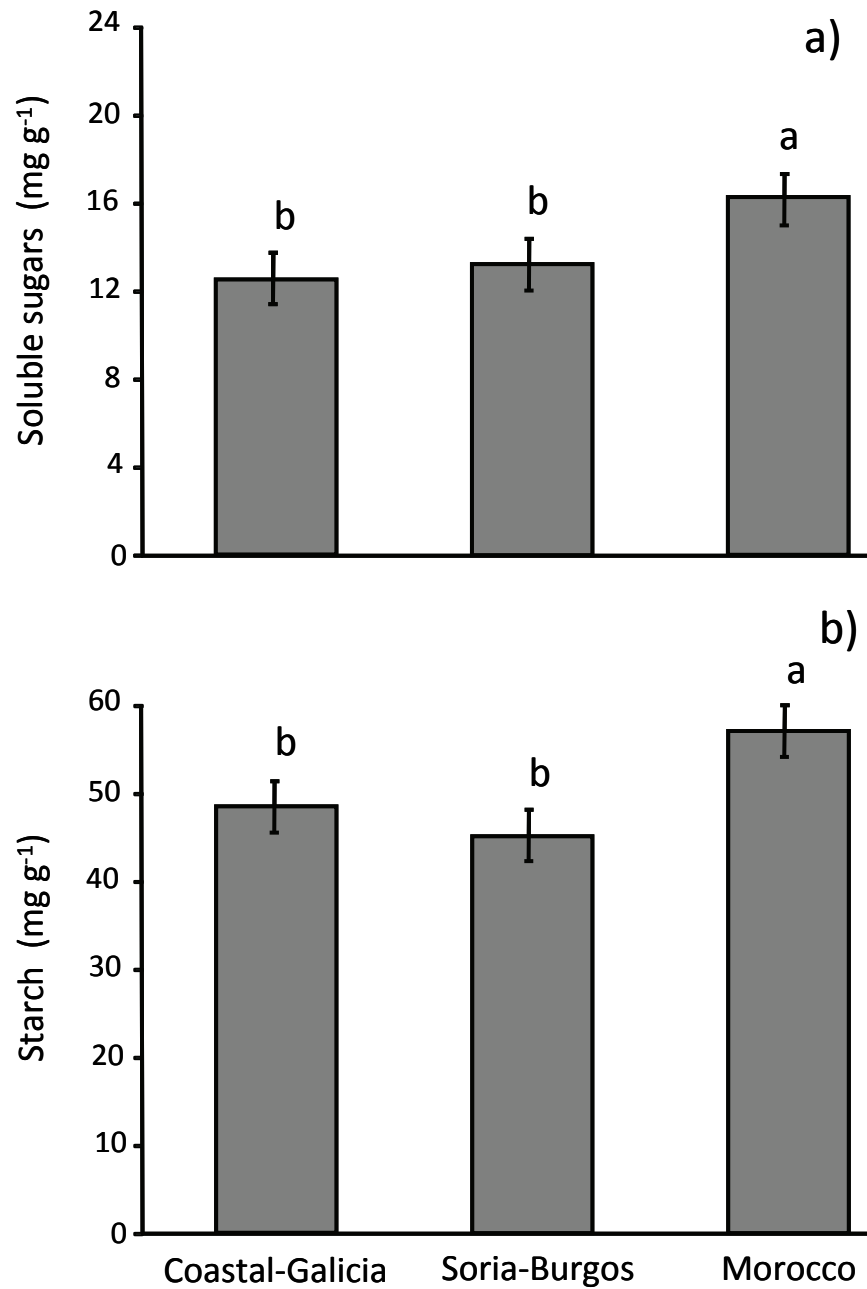

Figure S4. Concentration of a) soluble sugars and b) starch in the basal section of the stem of three Maritime pine populations (Coastal-Galicia, Soria-Burgos and Morocco). Weevils were allowed to feed on the plants for 6 days. Bars are overall means ( $\pm$  S.E) across the four light and the two herbivory treatments (N = 36). Different letters above the bars denote significant differences ( $p < 0.05$ ) among populations.
