# Supplementary material for: Effect of Light Availability on the Interaction between Maritime Pine and the Pine Weevil: Light Drives Insect Feeding Behavior But Also the Defensive Capabilities of the Host
Source: PubMed Central journal article supplement (PMC5583597; doi:10.3389/fpls.2017.01452), 2017-08-29
Supplement: Table_1.pdf [file Table_1.pdf]

**Effect of light availability on the interaction between Maritime pine and the pine weevil: light drives insect feeding behavior but also the defensive capabilities of the host**

Estefanía Suárez-Vidal, Xosé López-Goldar, Luis Sampedro, Rafael Zas\*

Misión Biológica de Galicia (MBG-CSIC), Apdo. 28, Pontevedra 36143, Galicia, Spain

\* Author for correspondence: [rzas@mbg.csic.es](mailto:rzas@mbg.csic.es)

Table S1. Summary of the mixed model for the analysis of the number and size of feeding scars caused by the pine weevil on the stem of young pine trees of three pine populations after 6 days of feeding under a factorial combination of light availability (sunlight/darkness) applied to the plant and to the insect. Degrees of freedom (DF), F ratios and associated probability levels are shown. Significant effects ( $p < 0.05$ ) are highlighted in bold font. The size of pine weevils (weevil weight) was included as a covariate in the model.

| Effect                | DF   | Number of scars |              | Mean score area |                  |
|-----------------------|------|-----------------|--------------|-----------------|------------------|
|                       |      | F               | Pr > F       | F               | Pr > F           |
| Light on plant (LP)   | 1,54 | 0.3             | 0.596        | 0.1             | 0.789            |
| Light on insect (LI)  | 1,54 | 2.4             | 0.125        | 4.8             | <b>0.034</b>     |
| LP x LI               | 1,54 | 4.1             | <b>0.049</b> | 1.5             | 0.219            |
| Pine population (POP) | 2,54 | 2.9             | 0.066        | 4.6             | <b>0.014</b>     |
| LP x POP              | 2,54 | 1.8             | 0.183        | 1.3             | 0.293            |
| LI x POP              | 2,54 | 0.8             | 0.437        | 3.6             | <b>0.033</b>     |
| LP x LI x POP         | 2,54 | 3.1             | 0.055        | 1.2             | 0.305            |
| Weevils weith         | 1,54 | 2.3             | 0.136        | 14.2            | <b>&lt;0.001</b> |
